# Supplementary material for: Highly efficient loading of amorphous paclitaxel in mesoporous hematite nanorods and their in vitro antitumor activity
Source: Royal Society of Chemistry journal article supplement (doi:10.1039/c3tb00472d), 2013-01-01
Supplement: c3tb00472d.pdf [file c3tb00472d.pdf]

## Supplementary Information

### Highly Efficient Loading of Amorphous Paclitaxel in Mesoporous Hematite Nanorods and their *In Vitro* Antitumor Activity

Ming Wu, Xi-Ming Xia, Can Cui, Ping Yu, Yang Zhang, Lei Liu, Ren-Xi Zhuo, Shi-Wen Huang\*

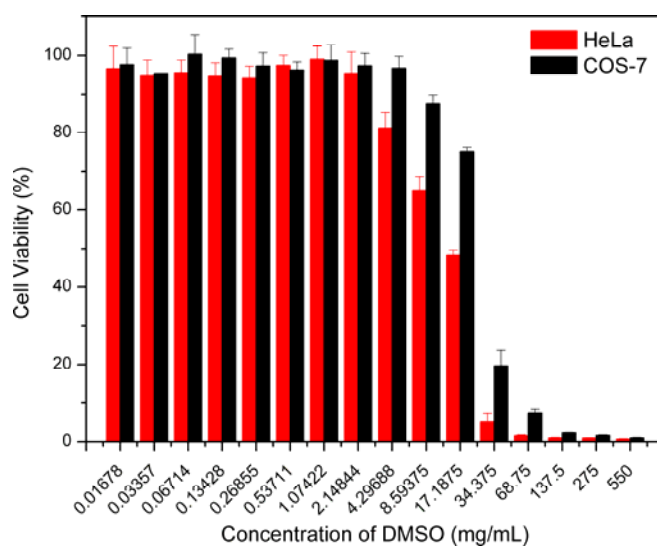

**Figure S1** *In vitro* cytotoxicity assay of DMSO on HeLa cells COS-7 cells after 48h incubation. The results represent the means of four independent experiments, and error bars represent the standard error of the mean.
